22 **Abstract**

- 23 1. Microplastics in soils have become an important threat for terrestrial systems,  
24 which can be exacerbated by drought as microplastics may affect soil water  
25 content. Thus, the interaction between these two factors may alter ecosystem  
26 functions such as litter decomposition, stability of soil aggregates, as well as  
27 functions related to nutrient cycling. Despite this potential interaction, we know  
28 relatively little about how microplastics, under different soil water conditions,  
29 affect ecosystem functions and ecosystem multifunctionality.
- 30 2. To address this gap, we carried out a controlled-environment study using  
31 grassland plant communities. We applied the two factors microplastic fibers  
32 (absent, present) and soil water conditions (well-watered, drought), in all possible  
33 combinations in a factorial experiment. At harvest, we measured multiple  
34 ecosystem functions linked to nutrient cycling, litter decomposition, and soil  
35 aggregation and as terrestrial systems provide these functions simultaneously, we  
36 also assessed ecosystem multifunctionality.
- 37 3. Our results showed that the interaction between microplastic fibers and drought  
38 affected ecosystem functions and multifunctionality. Overall, drought had  
39 negatively affected nutrient cycling by decreasing potential enzymatic activities  
40 and increasing nutrient leaching, while microplastic fibers had a positive impact  
41 on soil aggregation and nutrient retention by diminishing nutrient leaching.  
42 Microplastic fibers also impacted enzymatic activities, soil respiration and  
43 ecosystem multifunctionality, but importantly, the direction of these effects  
44 depended on soil water status (i.e., they decreased under well watered conditions,  
45 but tended to increase or had similar effects under drought conditions). Litter  
46 decomposition had a contrary pattern.

47           4. *Synthesis and applications*. As soil water content is affected by climate change,  
48           our results suggest that areas with sufficiency of water would be negatively  
49           affected in their ecosystem functioning as microplastics increase in the soil;  
50           however, in areas subjected to drought, microplastics would have a neutral or  
51           slightly positive effect on ecosystem functioning.

52

53   **KEYWORDS:** Enzymatic activities, global change ecology, grasslands ecosystem, litter  
54   decomposition, nutrient cycling, nutrient leaching, soil pH, soil aggregation, soil respiration.

55

## 56           1. INTRODUCTION

57           Microplastics are a group of polymer-based particles with a diameter under 5 mm  
58           (Hidalgo-Ruz et al., 2012), which occur in many shapes, and possess a high physical and  
59           chemical diversity (Helmberger et al., 2020, Rillig, Lehmann, & Ryo 2019). These particles  
60           can originate from many sources, including tire abrasion, the loss of fibers from synthetic  
61           textiles during washing, or the environmental degradation of larger plastic objects (Boucher  
62           & Friot, 2017). In addition, many plastics are already produced as microplastics (primary  
63           microplastics), e.g. for use in the cosmetics industry (Boucher & Friot, 2017). Therefore,  
64           microplastics are ubiquitous around the globe and may pollute not only oceans but also  
65           terrestrial systems through soil amendments, plastic mulching, irrigation, flooding,  
66           atmospheric input and littering or street runoff (Bläsing & Amelung, 2018; Rillig, 2012; de  
67           Souza Machado et al., 2018).

68           Our knowledge about microplastic effects on ecosystem functions is limited (Rillig  
69           and Lehmann, 2020) and potential interactive effects of microplastics with soil water  
70           availability are unknown. Among microplastics, microfibers are considered one of the most  
71           abundant microplastic types in the soil (Zhang and Liu, 2018, Dris et al., 2015), and these can

72 potentially affect soil-water dynamics due to their linear shape, size and flexibility. For  
73 instance, microplastic fibers can enhance soil water holding capacity and so lead to the  
74 retention of water for longer periods (de Souza Machado et al., 2019), thus altering soil water  
75 conditions, and potentially influencing ecosystem functions. Indeed, microplastic fibers may  
76 promote plant growth and other processes (de Souza Machado et al., 2019), and this could  
77 alleviate drought conditions promoting plant productivity at the community level (Lozano  
78 and Rillig, 2020). All of this suggests that microplastic effects on ecosystem functionality  
79 may be exacerbated when other global change drivers, such as drought, come into play.

80         This potential interaction between microplastics in the soil and drought can affect  
81 multiple ecosystem functions involved in nutrient cycling, litter decomposition or soil  
82 aggregation. However, research on how microplastics and drought affect such functions has  
83 been limited. For example, nutrient cycling and energy flows are closely related to soil  
84 enzymes produced by microbes and plants (Stark et al., 2014), and enzymatic activity is  
85 highly influenced by environmental factors such as soil pH, nutrient availability and soil  
86 water content (Paul & Clark, 1989). By altering these factors, microplastics may potentially  
87 affect soil enzymatic activities. Indeed, there is evidence for microplastic influencing some  
88 enzymes: microplastics can stimulate or inhibit the activity of fluorescein diacetate hydrolase  
89 depending on the polymer type (de Souza Machado et al., 2019; Fei et al., 2020, Liu et al.,  
90 2017), or stimulate phenol oxidase (Liu et al., 2017), urease and acid phosphatase activities  
91 (Fei et al., 2020). In contrast, data on the effect that microplastic may have on key enzymes  
92 related to C, N, P-cycling (such as  $\beta$ -glucosidase and  $\beta$ -D-cellobiosidase involved in cellulose  
93 degradation, or  $\beta$ -glucosaminidase involved in chitin degradation) are missing or limited (as  
94 in the case of phosphatases).

95         Litter decomposition is also a key ecosystem function with a crucial role in carbon  
96 cycling (Schmidt et al., 2011). This process depends on many factors including soil water

97 content, litter quality and the decomposer community (Paul & Clark, 1989). Microplastics  
98 may directly affect decomposition by modifying some of these factors, or indirectly through  
99 its effects on soil aggregation (a function that is highly correlated with decomposition). So  
100 far, empirical evidence of the effect of microplastics on litter decomposition is sparse  
101 (Barreto et al., 2020), and we know even less about how decomposition might be affected  
102 under different water regimes (e.g., well-watered, drought conditions). Similarly, there are  
103 few data on microplastic impacts on soil aggregation, a key ecosystem function (Giling et al.,  
104 2019) which is also affected by biotic and abiotic factors (Bronick & Lal, 2005), and  
105 influences soil water dynamics and soil carbon storage (Peng et al., 2015). Microplastics may  
106 affect soil aggregation processes as they could reduce the stability of soil aggregates by  
107 affecting soil biota (Lehmann et al., 2019, Liang et al., 2019, de Souza Machado et al., 2019).  
108 Microplastics can also promote soil aggregation by helping to entangle soil particles (Rillig,  
109 Ryo et al., 2019) and by keeping the water in the soil for longer (de Souza Machado et al.,  
110 2019). This would counteract the negative effects that drought may have on soil aggregation  
111 (Zhang et al., 2018).

112         The trends summarized above not only illustrate the scarce knowledge about the  
113 effects of microplastic on terrestrial ecosystem functions, but also suggest the potential link  
114 between microplastics and drought as changes in soil water conditions may exacerbate the  
115 magnitude of microplastic effects and its direction (positive or negative), depending on the  
116 function measured. The net effect of each ecosystem function can alter the overall  
117 functioning of the soil. Given this heterogeneity of effects, and that ecosystem functioning is  
118 inherently multidimensional, addressing how microplastic influence multifunctionality  
119 (defined as the ability of an ecosystem to deliver multiple functions simultaneously (Hector  
120 & Bagchi, 2007)) could generate an integrative understanding of the terrestrial systems  
121 response to this global change driver.

122 To address these questions, we established microcosms, containing plant communities, on  
123 which we assessed the effect of microplastic fiber addition and drought in a factorial design  
124 given that we expect microplastic fibers to affect soil-water dynamics, on different ecosystem  
125 functions related to nutrient cycling, soil aggregation, decomposition, (Giling et al., 2019)  
126 and on ecosystem multifunctionality. We expected that microplastic fibers would affect  
127 single ecosystem functions and ecosystem multifunctionality in a positive or negative way  
128 depending on soil water conditions.

129

## 130 **2. MATERIALS AND METHODS**

### 131 **2.1. Microplastics and soil preparation**

132 In Dedelow, Brandenburg, Germany (53° 37' N, 13° 77' W), we collected dry sandy  
133 loam soil from grasslands communities (0.07% N, 0.77% C, pH 6.66). Soil was sieved (4 mm  
134 mesh size), homogenized and mixed with microplastic fibers at a concentration of 0.4%. This  
135 concentration aimed to simulate low to medium level of microplastic pollutions, since in soils  
136 of highly polluted areas a microplastic concentration up to ~7% was observed (Fuller and  
137 Gautam, 2016). To do so, we manually cut with scissors polyester fibers (Rope Paraloc  
138 Mamutec polyester white, item number, 8442172, Hornbach.de) to generate microplastic  
139 fibers that had a length of  $1.28 \pm 0.03$  mm. Twelve grams of microplastic fibers (~763333  
140 fibers  $\text{g}^{-1}$  microplastic) were mixed into 3 kg of soil for each pot. For each experimental unit,  
141 microplastic fibers were separated manually and mixed with the soil in a large container  
142 before placing into each individual pot, to help provide a homogeneous distribution of  
143 microplastic fibers throughout the soil and the intended microfiber concentration. Twenty  
144 experimental units (pots) were established. Half had soil with microplastic fibers, while the  
145 other half had soil without added microplastic fibers. Soil was mixed in all experimental units

146 in order to provide the same level of disturbance. For additional details see Lozano and Rillig  
147 (2020).

148

## 149 **2.2. Experimental setup**

150 In May 2019 we established the experiment in a temperature-controlled glasshouse  
151 with a daylight period set at 12 h, 50 klx, a temperature regime at 22/18 °C day/night, and a  
152 relative humidity of ~40 %. We selected seven grassland plant species frequently co-  
153 occurring in Central Europe, which naturally grow in the same patch in dry grasslands in the  
154 Brandenburg region, Germany. Seeds of *Festuca brevipila*, *Holcus lanatus*, *Calamagrostis*  
155 *epigejos*, *Achillea millefolium*, *Hieracium pilosella*, *Plantago lanceolata* and *Potentilla*  
156 *argentea*, were obtained from a commercial supplier in the region (Rieger-Hofmann GmbH,  
157 Blaufelden, Germany) in order to shape a plant community typical of temperate grasslands  
158 ecosystems. Seeds were surface-sterilized with 10% sodium hypochlorite for 5 min and 75%  
159 ethanol for 2 minutes, thoroughly rinsed with sterile water and germinated in trays with  
160 sterile sand. Then, we randomly transplanted seedlings of similar size into pots (16 cm  
161 diameter, 16.5 cm height, 3L) where twenty-one holes were dug with a distance of 2.5 cm.  
162 This way, a plant community consisting of three individuals of each of the seven plant  
163 species was established in each pot. We will refer to plant species by their generic names  
164 from now on.

165 Pots were well-watered (100 ml twice a week) during the first three weeks of growth.  
166 Then, half of them were kept at ~70% of soil water holding capacity (WHC) by adding 200  
167 ml of water, while the other half were kept at ~ 30% WHC by adding 50 ml of water. Pots  
168 were watered from the top twice a week for two months with distilled water. Previous assays  
169 showed that these amounts and frequency of watering keep the established WHC. We thus  
170 had 20 experimental units in a fully crossed orthogonal design that includes two microplastic

171 fiber treatments (one with and the other without added microplastic fibers, also called  
172 “present” and “absent”) and two drought treatments (with and without drought, also called  
173 “drought” and “well-watered”), with five replicates each ( $n = 5$ ). Pots were randomly  
174 distributed in the chamber and their position was shifted twice to homogenize environmental  
175 conditions experienced by each replicate during the experiment.

176 At harvest we measured eleven variables that capture aspects of decomposition,  
177 nutrient cycling and soil structure formation (litter decomposition,  $\beta$ -glucosidase,  $\beta$ -  
178 glucosaminidase,  $\beta$ -D-cellobiosidase, phosphatase, soil respiration, water stable aggregates,  
179 leaching of  $\text{NO}_3^-$ ,  $\text{SO}_4^{2-}$ ,  $\text{PO}_4^{3-}$ , and soil pH; functions hereafter).

180

### 181 **2.3. Measurement of soil ecosystem functions**

182 *Soil nutrient cycling:* In fresh soil, we measured four functions related to C, N and P cycling:  
183 activity of  $\beta$ -glucosidase and  $\beta$ -D-cellobiosidase (cellulose degradation), N-acetyl- $\beta$ -  
184 glucosaminidase (chitin degradation) hereafter  $\beta$ -glucosaminidase, and phosphatase (organic  
185 phosphorus mineralization). Extracellular potential soil enzyme activities were measured  
186 from 1.0 g of soil by fluorometry as described in Bell et al. (2013).

187 *Soil respiration:* We took a 25 g soil subsample from each pot to measure soil respiration via  
188 an infrared gas analyzer. To do this, we placed the subsamples in individual 50 ml falcon  
189 tubes with modified lids that allow control of gas exchange via a rubber septum. We  
190 measured  $\text{CO}_2$  concentration (ppm) at two time points from these falcon tubes as described in  
191 Rillig, Ryo et al., 2019. The first time point was obtained after we flushed the tubes with  $\text{CO}_2$   
192 free air for five minutes thus reflecting  $\text{CO}_2$  concentration at time 0. The second point was  
193 obtained after letting the tubes with the soil samples incubate at  $25^\circ\text{C}$  for 65 h. At both time  
194 points, we took a 1-mL air sample and injected it to an infrared gas analyzer (LiCOR-



195 6400XT). We report soil respiration as the net CO<sub>2</sub> production (in ppm) after the incubation  
196 period by subtracting the measurement from the first time point from that of the second.

197 *Litter decomposition:* We collected plant material from dry grasslands where our species  
198 naturally grow (see Onandia et al., 2019 for methodological details) and obtained a composite  
199 sample that reflected the proportion of plant biomass of each plant species in the field. Plant  
200 material was oven-dried at 60 °C for 72 h, milled, and 0.75 mg were placed in 6×6 cm  
201 polyethylene terephthalate (PET, Sefar PET 1500, Farben-Frikell Berlin GmbH, Germany)  
202 bags with a mesh size of 49 µm. One litter bag was buried in each pot at 8 cm depth prior to  
203 seedling transplanting, and retrieved at harvest. Litter bags were stored at 4°C and processed  
204 within 2 weeks. Soil attached to the bags was carefully washed away using tap water and  
205 then, litter decomposition was estimated as mass loss after each bag was oven-dried at 60°C  
206 for 72 h.

207 *Soil aggregation:* Water stable soil aggregates are a proxy measure of soil aggregation and  
208 were measured following a modified version of the method of Kemper and Rosenau (1986),  
209 as described in Lehmann et al., 2019. Briefly, 4.0 g of dried soil (<4 mm sieve) was placed on  
210 small sieves with a mesh size of 250 µm. Soil was rewetted with deionized water by  
211 capillarity and inserted into a sieving machine (Agrisearch Equipment, Eijkelkamp,  
212 Giesbeek, Netherlands) for 3 min. Agitation and re-wetting causes the treated aggregates to  
213 slake. We collected the soil left on the sieve (coarse matter + water stable fractions, also  
214 called dry matter) and then separated the coarse matter by crushing the aggregates and  
215 pushing the soil through the sieve. Dry matter and then coarse matter were dried at 60 °C for  
216 24 h. Soil aggregation (i.e., water stable aggregates) was calculated as:  $WSA (\%) = (\text{Dry matter} - \text{coarse matter}) / (4.0 \text{ g} - \text{coarse matter})$ .  
217

218 *Soil nutrient leaching and pH.* At harvest, pots were watered to saturate the soil to roughly  
219 10% beyond the water holding capacity, simulating a rain event, to induce leaching. Leachate

220 percolating through the soil column was collected from small outlets at the bottom of the pot  
221 and was assessed for nutrient concentrations ( $\text{NO}_3^-$ ,  $\text{SO}_4^{2-}$ ,  $\text{PO}_4^{3-}$ ) using ion chromatography  
222 (Dionex ICS-1100, AS9-HC, Thermo Scientific Massachusetts, USA). Air-dried soils were  
223 extracted in deionized water for 1 h to achieve a 1:5 (v:v) soil: water solution and soil pH was  
224 determined with a Hanna pH-meter (Hanna Instruments GmbH, Vöhringen, Deutschland).

225

#### 226 **2.4. Assessing ecosystem multifunctionality**

227 To calculate ecosystem multifunctionality we followed the ecosystem function  
228 multifunctionality method proposed by Manning et al. (2018). Briefly, we identified the  
229 clusters of 12 ecosystem functions (Figure S1), which included the soil functions measured in  
230 this study and total shoot mass (raw data obtained from Lozano and Rillig (2020)). This  
231 cluster analysis allowed us to give more even weights to the ecosystem functions as they are  
232 interrelated and shared drivers. We determined the number of clusters by the Elbow method,  
233 (Kassambara & Mundt, 2017) and weighted each of them equally, irrespective of the number  
234 of functions within each cluster. Four clusters were determined. Then, we calculated the  
235 standardized maximum for each function and placed the function data on a standardized  
236 scale. Thus, we standardized by the average of the top 10% values within the data and  
237 calculated ecosystem multifunctionality for each experimental unit using the threshold  
238 approach, in which each ecosystem function that exceeds 70 % of the standardized maximum  
239 contributed one to the ecosystem multifunctionality score. Additional calculations of  
240 ecosystem multifunctionality were done using a threshold of 30% and 50% (Figure S2, Table  
241 S1).

242

#### 243 **2.5. Statistical analyses**

244 The experimental design was a fully crossed orthogonal design where microplastic  
245 fibers, drought, and the interaction were considered fixed factors. Each function was analyzed  
246 using linear models. Model residuals were checked to validate normality and variance  
247 homogeneity assumptions. We implemented the “varIdent” function to account for  
248 heterogeneity in the microplastic fiber treatment for  $\beta$ -D-cellobiosidase, soil aggregation, and  
249 in the water treatment for soil respiration. The effect of microplastics and drought on the  
250 ecosystem multifunctionality index was analyzed using generalized linear models with a  
251 quasibinomial distribution and a logit link function to avoid overdispersion. We also assessed  
252 the contribution of each function to multifunctionality by using the down-weighting data after  
253 clustering and the metric “pmvd” from the package “relaimpo” (Grömping, 2006). This  
254 metric is based on sequential  $R^2$ s, but takes care of the dependence on orderings by weighted  
255 averages with data-dependent weights and also guarantees that a regressor with 0 estimated  
256 coefficient is assigned a relative importance of 0 (Grömping, 2006). Statistical analyses  
257 were done with R version 3.5.3 (R Core Team, 2019). Results shown throughout the text are  
258 mean values  $\pm$  1 standard error (SE).

259

### 260 **3. RESULTS**

261 Ecosystem functions were affected by microplastic fibers, drought and their  
262 interaction (Table 1). While enzymatic activities and soil respiration were on average higher  
263 under well-watered than under drought conditions, these trends changed in the presence of  
264 microplastics, decreasing under well-watered conditions but increasing under drought. As for  
265 enzymatic activity,  $\beta$ -glucosaminidase decreased by 29% with drought and was not affected  
266 by microplastic fibers (Table 1, Figure 1).  $\beta$ -D-cellobiosidase decreased by 62% with drought  
267 ( $p = 0.02$ ), while soil respiration was marginally affected by microplastic fibers and drought  
268 ( $p = 0.1$ ). Phosphatase and  $\beta$ -glucosidase were affected by the interaction between

269 microplastic fibers and drought ( $p = 0.03$ ,  $p = 0.1$ , respectively). Both decreased with  
270 microplastic fibers in soil by 27% and 17% under well-watered while increasing by 75% and  
271 40% under drought conditions, respectively (Table 1, Figure 1). By contrast, litter  
272 decomposition increased with microplastic fibers by 6.4 % under well-watered conditions  
273 while decreasing by 6.6% under drought conditions ( $p = 0.09$ , Figure 1). Likewise, soil  
274 aggregation increased with microplastic fibers under both well-watered and drought  
275 conditions by 15 % and 21.7 %, respectively ( $p = 0.07$ ). Overall, soil leachate nutrients  
276 increased with drought and decreased with microplastic fibers in the soil. Specifically,  
277 leachate  $\text{NO}_3^-$  decreased by 70% with microplastic fibers under drought conditions ( $p = 0.01$ ,  
278 Figure 1), a similar trend was found under watered conditions. Leachate  $\text{SO}_4^{2-}$  decreased with  
279 microplastic fibers under either well-watered or drought conditions by 52% and 37%,  
280 respectively ( $p = 0.01$ ).  $\text{PO}_4^{3-}$  in leachate was not clearly affected by drought or microplastic  
281 fibers, while soil pH increased both with drought and microplastic fibers in the soil ( $p < 0.01$ ,  
282 Figure 1).

283 Ecosystem multifunctionality was affected by the interaction between microplastic  
284 fibers and drought (Table 1, Figure 2). That is, the effect of microplastics on ecosystem  
285 multifunctionality strongly depended on the drought treatment ( $p = 0.01$ ): under well-watered  
286 conditions, microplastic fibers addition to the soil decreased multifunctionality, while under  
287 drought conditions, microplastic addition did not affect multifunctionality (Figure 2).  
288 Different thresholds when calculating multifunctionality showed similar trends (Figure S2,  
289 see Table S1 for statistical results). The analysis of the relative importance of each function  
290 showed that  $\beta$ -glucosidase (31.87 %), soil respiration (25.65 %), phosphatase (11.14 %), pH  
291 (9.16 %),  $\text{SO}_4^{2-}$  (8.84 %),  $\beta$ -D-cellobiosidase (3.03 %),  $\beta$ -glucosaminidase (2.88 %), shoot  
292 mass (1.88 %),  $\text{PO}_4^{3-}$  (1.67 %), soil aggregation (1.63 %), litter decomposition (1.56 %),  $\text{NO}_3^-$   
293 (0.62%) contributed in this order to multifunctionality ( $R^2 = 91.53$  %, Figure 3).

294

## 295 **4. DISCUSSION**

296 As hypothesized, microplastic fibers and drought affected ecosystem functions linked  
297 with soil aggregation, nutrient cycling and decomposition as well as ecosystem  
298 multifunctionality. Overall, drought had a negative impact on ecosystem functions, while the  
299 impact of microplastic fibers depended on the soil water status and the function considered.  
300 Below, we discuss likely mechanisms behind these complex outcomes.

301

### 302 **4.1. Soil aggregation increased with microplastic fibers irrespective of drought**

303 Microplastic fibers promoted soil aggregation either under well-watered or drought  
304 conditions, likely due to positive effects of fibers on soil bulk density, aeration and water  
305 retention (de Souza Machado et al., 2019), which may promote root growth (Lozano & Rillig,  
306 2020) and hyphal extension (Elliot & Coleman, 1988; Wang et al., 2017). Therefore, roots,  
307 hyphae and microplastic fibers might together have helped entangle soil particles, thus  
308 promoting soil aggregation. In addition, microbial communities might have shifted, and this  
309 may also have contributed to the observed soil aggregation response.

310

### 311 **4.2. Microplastic fibers reduce soil enzyme activity and soil respiration only under** 312 **well watered conditions.**

313 We observed that microplastic fibers affected potential enzymatic activities and soil  
314 respiration depending on soil water conditions. That is, under drought, enzymes and soil  
315 respiration increased when microplastic fibers were added, probably because soil water  
316 content and aeration may increase with microplastic fibers (de Souza Machado et al., 2019;  
317 Rillig et al., 2019), which in turn may promote microbial activity (Nannipieri et al., 2002,  
318 Alster et al., 2013, Sanaullah et al., 2011). By contrast, under well-watered conditions,

319 enzymes and soil respiration decreased with microfibers in the soil, probably linked with a  
320 decline in soil microbial community richness and diversity as seen by Fei et al. (2020), a  
321 negative effect that could be exacerbated if microfibers may release harmful contaminants  
322 into the soil (Rillig, 2012; Wang et al., 2019).

323

#### 324 **4.3. Microplastic fibers increase litter decomposition under well-watered conditions**

325 Litter decomposition increased under well-watered conditions when microplastic  
326 fibers were added. Our results suggest that the increase in litter decomposition may be related  
327 to an increase in soil aggregation. Soil aggregation promotes oxygen diffusion within larger  
328 soil pores and regulates water flow, which in turn stimulate microbial activity (Six et al.,  
329 2004) promoting litter decomposition. In addition, soil pH, a parameter influenced by soil  
330 aggregation (Jiang et al., 2013), that affects soil microbial community structure (Fierer &  
331 Jackson, 2006), could also have played a role. In fact, recent research found that an increase  
332 in litter decomposition was linked with better soil aggregation (Yang et al., 2019). Our results  
333 suggest that microplastics, through effects on litter decomposition may have large  
334 consequences for ecosystem C stocks and fluxes, as changes in litter decomposition may  
335 influence the feedback to the atmosphere from terrestrial ecosystems.

336

#### 337 **4.4. Microplastics fibers reduce soil nutrient leaching**

338 Nutrient leaching, after a simulated rain event, increased under drought but decreased  
339 when microplastic fibers were added to the soil. Drought conditions might have led to the  
340 formation of cracks as preferential flow paths in the soil, increasing the leaching of nutrients  
341 when the soils were rewetted. In support of this, in fertilized soils the leachate  $\text{NO}_3^-$  was  
342 threefold higher under drought than under non-drought conditions (Klaus et al., 2020).  
343 Nutrient leaching is also known to be related to change in the structure of plant and microbial

344 communities (Mueller et al., 2013), biotic factors that are indeed affected by drought (Lozano  
345 et al., 2019, Fitzpatrick et al., 2018). Likewise, we observed that leachate  $\text{PO}_4^{3-}$  was not  
346 affected by drought, most likely because phosphates are more strongly bound to soil particles  
347 than nitrate or sulphate (Paul & Clark, 1989). By contrast, nutrient leaching decreased with  
348 microplastic fibers (i.e., more nutrient retention). This can be related to the positive effect that  
349 microfibers had on soil aggregation, which may have increased the soil capacity to retain  
350 nutrients. This positive relation between soil nutrients retention and soil aggregation has been  
351 reported by Liu, Han, & Zhang (2019).

352

#### 353 **4.5. Microplastic fibers and drought effects on ecosystem multifunctionality and** 354 **ecosystem services**

355 Our results showed that microplastic fibers and drought impacted not only single  
356 functions but also multifunctionality, and that such impact depended on the interaction  
357 between these two global change factors. Specifically, with the addition of microplastic  
358 fibers, ecosystem multifunctionality decreased under well-watered conditions, while giving  
359 rise to similar functioning under drought conditions. This trend mirrors the one observed for  
360 nutrient cycling functions (i.e.,  $\beta$ -glucosidase, soil respiration), as they are the ones that  
361 contribute most to multifunctionality. Thus, this result highlights the importance of  
362 considering nutrient cycling functions when managing microplastics in soils.

363 Our results showed that two global change drivers (i.e., microplastics and drought)  
364 influence ecosystem functions and multifunctionality, which in turn may affect ecosystem  
365 services (Manning et al., 2018; Díaz et al., 2018) and thus impact various aspects of human  
366 well-being. In the short term, microplastic fibers may contribute to plant productivity or soil  
367 aggregation; however, we do not currently know what the long-term responses will be, as  
368 additional factors could come into play. Indeed, microplastic fibers may release harmful

369 chemical substances into the soil (Fred-Ahmadu et al., 2020) and affect nutrient cycling  
370 processes, with consequences for soil quality, and thus on the provision of different services,  
371 such as food and water (MEA, 2005). This becomes relevant as agricultural lands are often  
372 managed with sewage sludge or compost, which contains a large amount of microplastic  
373 fibers (Wang et al., 2019; Weithmann et al., 2018).

374 As microplastics may come into the soil in different shapes (Rillig et al., 2019) and  
375 polymer types (Helmberger et al., 2020), it is important to understand how different  
376 microplastic types may affect ecosystem functionality. However, our findings provide clear  
377 empirical evidence that microplastics in soil affect ecosystem multifunctionality of terrestrial  
378 ecosystems, a phenomenon that may be strongly affected in future scenarios of global  
379 change, as changes in water regime are projected to occur in many areas worldwide. Our  
380 results also highlight the potential of microplastic to affect Earth system feedbacks of  
381 terrestrial ecosystems, especially via observed changes in litter decomposition, respiration  
382 fluxes and soil aggregation.

383

#### 384 **ACKNOWLEDGMENTS**

385 The work was funded by the German Federal Ministry of Education and research (BMBF)  
386 within the collaborative Project “Bridging in Biodiversity Science (BIBS-phase 2)” (funding  
387 number 01LC1501A). MCR additionally acknowledges funding through an ERC Advanced  
388 Grant (694368). We thank Tydings Morrison, Carlos Acame and Jenny M. Ospina for their  
389 assistance in the experimental setup and data collection. We thank Walter Waldman for  
390 helpful discussions about microplastics properties, Arthur Gessler for valuable advice about  
391 decomposition assessment and Dr. Peter Manning for helpful comments on earlier versions of  
392 this manuscript. The authors declare no competing financial interest.

393



394 **DATA AVAILABILITY STATEMENT**

395 We will not be archiving data because all data used are present in the manuscript.

396

397 **AUTHOR CONTRIBUTIONS**

398 YML, CAAT, GO and MCR conceived the ideas and designed methodology; YML, CAAT,

399 GO and SM established and maintained the experiment in the greenhouse; ZTT analyzed the

400 soil enzymatic activities. YML analyzed the data and wrote the first draft of this manuscript.

401 All authors contributed to the final version and gave final approval for publication.

402

403

404

405

406 **REFERENCES**

407

408 Alster, C. J., German, D. P., Lu, Y. & Allison, S. D. (2013) Microbial enzymatic responses to  
409 drought and to nitrogen addition in a southern California grassland. *Soil Biology and*  
410 *Biochemistry*, **64**, 68-79.

411 Barreto, C., Rillig, M. C. & Lindo, Z. (2020) Addition of polyester in soil affects decomposition  
412 rates but not microarthropod communities. *Soil Organisms*, **(in press)**.

413 Bell, C. W., Fricks, B. E., Rocca, J. D., Steinweg, J. M., McMahon, S. K. & Wallenstein, M.  
414 D. (2013) High-throughput fluorometric measurement of potential soil extracellular  
415 enzyme activities. *Journal of visualized experiments : JoVE*, e50961-e50961.

416 Bläsing, M. & Amelung, W. (2018) Plastics in soil: Analytical methods and possible sources.  
417 *Science of The Total Environment*, **612**, 422-435.

418 Boucher, J. & Friot, D. (2017) *Primary Microplastics in the Oceans: A Global Evaluation of*  
419 *Sources*. IUCN, Gland, Switzerland:.

420 Bronick, C. J. & Lal, R. (2005) Soil structure and management: a review. *Geoderma*, **124**, 3-  
421 22.

422 de Souza Machado, A. A., Kloas, W., Zarfl, C., Hempel, S. & Rillig, M. C. (2018)  
423 Microplastics as an emerging threat to terrestrial ecosystems. *Global Change*  
424 *Biology*, **24**, 1405-1416.

425 de Souza Machado, A. A., Lau, C. W., Kloas, W., Bergmann, J., Bachelier, J. B., Faltin, E.,  
426 Becker, R., Görlich, A. S. & Rillig, M. C. (2019) Microplastics Can Change Soil  
427 Properties and Affect Plant Performance. *Environmental Science & Technology*, **53**,  
428 6044-6052.

429 Díaz, S., Pascual, U., Stenseke, M., Martín-López, B., Watson, R. T., Molnár, Z., Hill, R.,  
430 Chan, K. M. A., Baste, I. A., Brauman, K. A., Polasky, S., Church, A., Lonsdale, M.,  
431 Larigauderie, A., Leadley, P. W., van Oudenhoven, A. P. E., van der Plaats, F.,  
432 Schröter, M., Lavorel, S., Aumeeruddy-Thomas, Y., Bukvareva, E., Davies, K.,

- 433 Demissew, S., Erpul, G., Failler, P., Guerra, C. A., Hewitt, C. L., Keune, H., Lindley,  
434 S. & Shirayama, Y. (2018) Assessing nature's contributions to people.  
435 *Science*, **359**, 270.
- 436 Dris, R., Gasperi, J., Rocher, V., Saad, M., Renault, N. & Tassin, B. (2015) Microplastic  
437 contamination in an urban area: a case study in Greater Paris. *Environmental*  
438 *Chemistry*, **12**, 592-599.
- 439 Elliott, E. T. & Coleman, D. C. (1988) Let the Soil Work for Us. *Ecological Bulletins*, 23-32.
- 440 Fei, Y., Huang, S., Zhang, H., Tong, Y., Wen, D., Xia, X., Wang, H., Luo, Y. & Barceló, D.  
441 (2020) Response of soil enzyme activities and bacterial communities to the  
442 accumulation of microplastics in an acid cropped soil. *Science of The Total*  
443 *Environment*, **707**, 135634.
- 444 Fierer, N. & Jackson, R. B. (2006) The diversity and biogeography of soil bacterial  
445 communities. *Proceedings of the National Academy of Sciences of the United States*  
446 *of America*, **103**, 626.
- 447 Fitzpatrick, C. R., Copeland, J., Wang, P. W., Guttman, D. S., Kotanen, P. M. & Johnson, M.  
448 T. J. (2018) Assembly and ecological function of the root microbiome across  
449 angiosperm plant species. *Proceedings of the National Academy of Sciences*.
- 450 Fred-Ahmadu, O. H., Bhagwat, G., Oluyoye, I., Benson, N. U., Ayejuyo, O. O. & Palanisami,  
451 T. (2020) Interaction of chemical contaminants with microplastics: Principles and  
452 perspectives. *Science of The Total Environment*, **706**, 135978.
- 453 Fuller, S. & Gautam, A. (2016) A Procedure for Measuring Microplastics using Pressurized  
454 Fluid Extraction. *Environmental Science & Technology*, **50**, 5774-5780.
- 455 Giling, D. P., Beaumelle, L., Phillips, H. R. P., Cesarz, S., Eisenhauer, N., Ferlian, O.,  
456 Gottschall, F., Guerra, C., Hines, J., Sendek, A., Siebert, J., Thakur, M. P. & Barnes,  
457 A. D. (2019) A niche for ecosystem multifunctionality in global change research.  
458 *Global Change Biology*, **25**, 763-774.
- 459 Grömping, U. (2006) Relative Importance for Linear Regression in R: The Package  
460 relaimpo. *Journal of Statistical Software*, **17**, 1-27.

- 461 Hector, A. & Bagchi, R. (2007) Biodiversity and ecosystem multifunctionality. *Nature*, **448**,  
462 188-190.
- 463 Helmberger, M. S., Tiemann, L. K. & Grieshop, M. J. (2020) Towards an ecology of soil  
464 microplastics. *Functional Ecology*, **34**, 550-560.
- 465 Hidalgo-Ruz, V., Gutow, L., Thompson, R. & Thiel, M. (2012) Microplastics in the Marine  
466 Environment: A Review of the Methods Used for Identification and Quantification.  
467 *Environmental science & technology*, **46**, 3060-75.
- 468 Jiang, Y., Sun, B., Jin, C. & Wang, F. (2013) Soil aggregate stratification of nematodes and  
469 microbial communities affects the metabolic quotient in an acid soil. *Soil Biology and*  
470 *Biochemistry*, **60**, 1-9.
- 471 Kassambara, A. & Mundt, F. (2017) factoextra: Extract and Visualize the Results of  
472 Multivariate Data Analyses. **R package version 1.0.5.** [https://CRAN.R-](https://CRAN.R-project.org/package=factoextra)  
473 [project.org/package=factoextra](https://CRAN.R-project.org/package=factoextra).
- 474 Kemper, W. D. & Rosenau, R. C. (1986) Aggregate stability and size distribution. *Methods of*  
475 *soil analysis. Part 1. Physical and Mineralogical Methods* (ed A. Klute), pp. 425-442.  
476 Soil Science Society of America, American Society of Agronomy, Madison,  
477 Wisconsin.
- 478 Klaus, V. H., Friedritz, L., Hamer, U. & Kleinebecker, T. (2020) Drought boosts risk of nitrate  
479 leaching from grassland fertilisation. *Science of The Total Environment*, 137877.
- 480 Lehmann, A., Fitschen, K. & Rillig, C. M. (2019) Abiotic and Biotic Factors Influencing the  
481 Effect of Microplastic on Soil Aggregation. *Soil Systems*, **3**.
- 482 Liang, Y., Lehmann, A., Ballhausen, M.-B., Muller, L. & Rillig, M. C. (2019) Increasing  
483 Temperature and Microplastic Fibers Jointly Influence Soil Aggregation by Saprobic  
484 Fungi. *Frontiers in Microbiology*, **10**.
- 485 Liu, H., Yang, X., Liu, G., Liang, C., Xue, S., Chen, H., Ritsema, C. & Geissen, V. (2017)  
486 Response of soil dissolved organic matter to microplastic addition in Chinese loess  
487 soil. *Chemosphere*, **185**, 907-917.

- 488 Liu, M., Han, G. & Zhang, Q. (2019) Effects of Soil Aggregate Stability on Soil Organic  
489 Carbon and Nitrogen under Land Use Change in an Erodible Region in Southwest  
490 China. *International journal of environmental research and public health*, **16**, 3809.
- 491 Lozano, Y. M., Aguilar-Trigueros, C. A., Flaig, I. C. & Rillig, M. C. (2019) Root trait responses  
492 to drought depend on plant functional group. *bioRxiv*, 801951.
- 493 Lozano, Y. M. & Rillig, M. C. (2020) Effects of microplastic fibers and drought on plant  
494 communities. *Environmental Science & Technology*.
- 495 Manning, P., van der Plas, F., Soliveres, S., Allan, E., Maestre, F. T., Mace, G.,  
496 Whittingham, M. J. & Fischer, M. (2018) Redefining ecosystem multifunctionality.  
497 *Nature Ecology & Evolution*, **2**, 427-436.
- 498 MEA (2005) *Millenium Ecosystem Assessment. Ecosystems and Human Well-being:*  
499 *Synthesis*. Island Press, Washington, DC.
- 500 Mueller, K. E., Hobbie, S. E., Tilman, D. & Reich, P. B. (2013) Effects of plant diversity, N  
501 fertilization, and elevated carbon dioxide on grassland soil N cycling in a long-term  
502 experiment. *Global Change Biology*, **19**, 1249-1261.
- 503 Nannipieri, P., Kandeler, E. & Ruggiero, P. (2002) Enzyme Activities and Microbiological and  
504 Biochemical Processes in Soil. *Enzymes in the environment: Activity, ecology and*  
505 *applications* (eds R. G. Burns & R. P. Dick). Marcel Dekker, Inc., New York.
- 506 Onandia, G., Schittko, C., Ryo, M., Bernard-Verdier, M., Heger, T., Joshi, J., Kowarik, I. &  
507 Gessler, A. (2019) Ecosystem functioning in urban grasslands: The role of  
508 biodiversity, plant invasions and urbanization. *PLOS ONE*, **14**, e0225438.
- 509 Paul, E. A. & Clark, F. E. (1989) *Soil Microbiology and Biochemistry* Academic Press, San  
510 Diego, California.
- 511 Peng, X., Horn, R. & Hallett, P. (2015) Soil structure and its functions in ecosystems: Phase  
512 matter & scale matter. *Soil and Tillage Research*, **146**, 1-3.
- 513 R Core Team (2019) R: A language and environment for statistical computing. R Foundation  
514 for statistical computing. , Vienna, Austria.

- 515 Rillig, M. C. (2012) Microplastic in Terrestrial Ecosystems and the Soil? *Environmental*  
516 *Science & Technology*, **46**, 6453-6454.
- 517 Rillig, M. C. & Lehmann, A. (2020) Microplastic in terrestrial ecosystems. *Science*, **368**,  
518 1430.
- 519 Rillig, M. C., Lehmann, A., de Souza Machado, A. A. & Yang, G. (2019) Microplastic effects  
520 on plants. *New Phytologist*, **223**, 1066-1070.
- 521 Rillig, M. C., Lehmann, A., Ryo, M. & Bergmann, J. (2019) Shaping Up: Toward Considering  
522 the Shape and Form of Pollutants. *Environmental Science & Technology*, **53**, 7925-  
523 7926.
- 524 Rillig, M. C., Ryo, M., Lehmann, A., Aguilar-Trigueros, C. A., Buchert, S., Wulf, A., Iwasaki,  
525 A., Roy, J. & Yang, G. (2019) The role of multiple global change factors in driving soil  
526 functions and microbial biodiversity. *Science*, **366**, 886.
- 527 Sanaullah, M., Blagodatskaya, E., Chabbi, A., Rumpel, C. & Kuzyakov, Y. (2011) Drought  
528 effects on microbial biomass and enzyme activities in the rhizosphere of grasses  
529 depend on plant community composition. *Applied Soil Ecology*, **48**, 38-44.
- 530 Schmidt, M. W. I., Torn, M. S., Abiven, S., Dittmar, T., Guggenberger, G., Janssens, I. A.,  
531 Kleber, M., Kögel-Knabner, I., Lehmann, J., Manning, D. A. C., Nannipieri, P., Rasse,  
532 D. P., Weiner, S. & Trumbore, S. E. (2011) Persistence of soil organic matter as an  
533 ecosystem property. *Nature*, **478**, 49-56.
- 534 Six, J., Bossuyt, H., Degryze, S. & Denef, K. (2004) A history of research on the link  
535 between (micro)aggregates, soil biota, and soil organic matter dynamics. *Soil and*  
536 *Tillage Research*, **79**, 7-31.
- 537 Stark, S., Männistö, M. K. & Eskelinen, A. (2014) Nutrient availability and pH jointly constrain  
538 microbial extracellular enzyme activities in nutrient-poor tundra soils. *Plant and Soil*,  
539 **383**, 373-385.
- 540 Wang, J., Liu, X., Li, Y., Powell, T., Wang, X., Wang, G. & Zhang, P. (2019) Microplastics as  
541 contaminants in the soil environment: A mini-review. *Science of The Total*  
542 *Environment*, **691**, 848-857.

- 543 Wang, R., Dorodnikov, M., Dijkstra, F. A., Yang, S., Xu, Z., Li, H. & Jiang, Y. (2017)  
544 Sensitivities to nitrogen and water addition vary among microbial groups within soil  
545 aggregates in a semiarid grassland. *Biology and Fertility of Soils*, **53**, 129-140.
- 546 Weithmann, N., Möller, J. N., Löder, M. G. J., Piehl, S., Laforsch, C. & Freitag, R. (2018)  
547 Organic fertilizer as a vehicle for the entry of microplastic into the environment.  
548 *Science Advances*, **4**, eaap8060.
- 549 Yang, C., Li, J. & Zhang, Y. (2019) Soil aggregates indirectly influence litter carbon storage  
550 and release through soil pH in the highly alkaline soils of north China. *PeerJ*, **7**,  
551 e7949-e7949.
- 552 Zhang, G. S. & Liu, Y. F. (2018) The distribution of microplastics in soil aggregate fractions  
553 in southwestern China. *Science of The Total Environment*, **642**, 12-20.
- 554 Zhang, Q., Shao, M. a., Jia, X. & Zhang, C. (2018) Understory Vegetation and Drought  
555 Effects on Soil Aggregate Stability and Aggregate-Associated Carbon on the Loess  
556 Plateau in China. *Soil Science Society of America Journal*, **82**, 106-114.  
557

1 **TABLE 1.** Results from linear models on eleven ecosystems functions and multifunctionality  
 2 response to microplastic fibers (M), drought (D) and their interaction (M x D).  
 3 Multifunctionality also included shoot mass (data extracted from Lozano and Rillig, 2020).  
 4 Degrees of freedom of each factor (df =1). F values and p-values (in parentheses) are shown;  
 5 p values <0.1 in bold. n = 5.  
 6

| Ecosystem functions           | Microplastic fibers (M) | Drought (D)           | M x D              |
|-------------------------------|-------------------------|-----------------------|--------------------|
| $\beta$ -glucosaminidase      | 0.14 (0.70)             | 2.98 (0.10)           | 1.08 (0.31)        |
| $\beta$ -glucosidase          | 0.02 (0.89)             | <b>6.88 (0.01)</b>    | 2.31 (0.14)        |
| Phosphatase                   | 0.07(0.79)              | <b>3.55(0.07)</b>     | <b>5.53 (0.03)</b> |
| $\beta$ -D-cellobiosidase     | 2.14 (0.16)             | <b>6.32 (0.02)</b>    | 1.49 (0.23)        |
| Soil respiration              | 2.49 (0.13)             | 2.29 (0.14)           | 1.37 (0.25)        |
| Litter decomposition          | 0.002 (0.95)            | 0.88 (0.36)           | <b>3.13 (0.09)</b> |
| Soil aggregation              | <b>3.54 (0.07)</b>      | 2.51(0.13)            | 0.03(0.84)         |
| NO <sub>3</sub> <sup>-</sup>  | <b>10.66 (0.004)</b>    | <b>24.93 (0.0001)</b> | <b>7.85 (0.01)</b> |
| PO <sub>4</sub> <sup>3-</sup> | 0.36 (0.55)             | 0.25 (0.62)           | 0.08 (0.77)        |
| SO <sub>4</sub> <sup>2-</sup> | <b>6.75 (0.01)</b>      | <b>3.66 (0.07)</b>    | 0.00 (0.99)        |
| pH                            | <b>12.38 (0.002)</b>    | <b>9.14 (0.008)</b>   | 0.47 (0.50)        |
| Multifunctionality            | 3.16 (0.09)             | 3.02 (0.10)           | <b>7.23 (0.01)</b> |

7



8 **FIGURE 1.** Microplastic fibers and drought effects on twelve ecosystem functions. Mean and standard error are represented. Data points are  
 9 shown as circles. Enzymes and soil respiration units ( $\mu\text{mol g}^{-1}$  dry soil  $\text{hr}^{-1}$ , ppm). P-values in Table 1; n = 5.

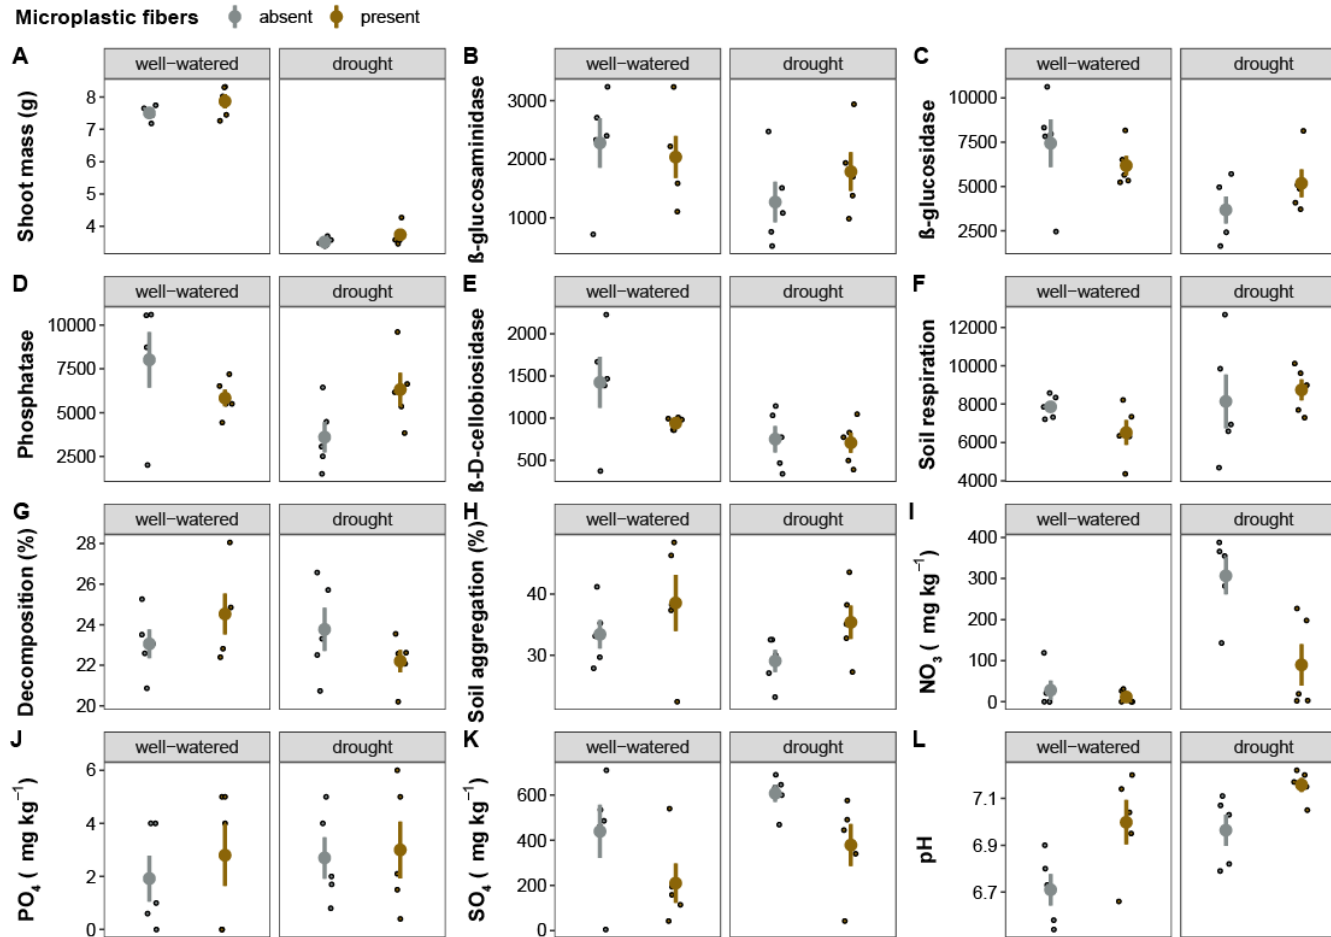

10

**FIGURE 2.** Microplastic fibers and drought effects on ecosystem multifunctionality. Mean and standard error are represented. Data points are shown as circles; P-values in Table 1; n = 5.

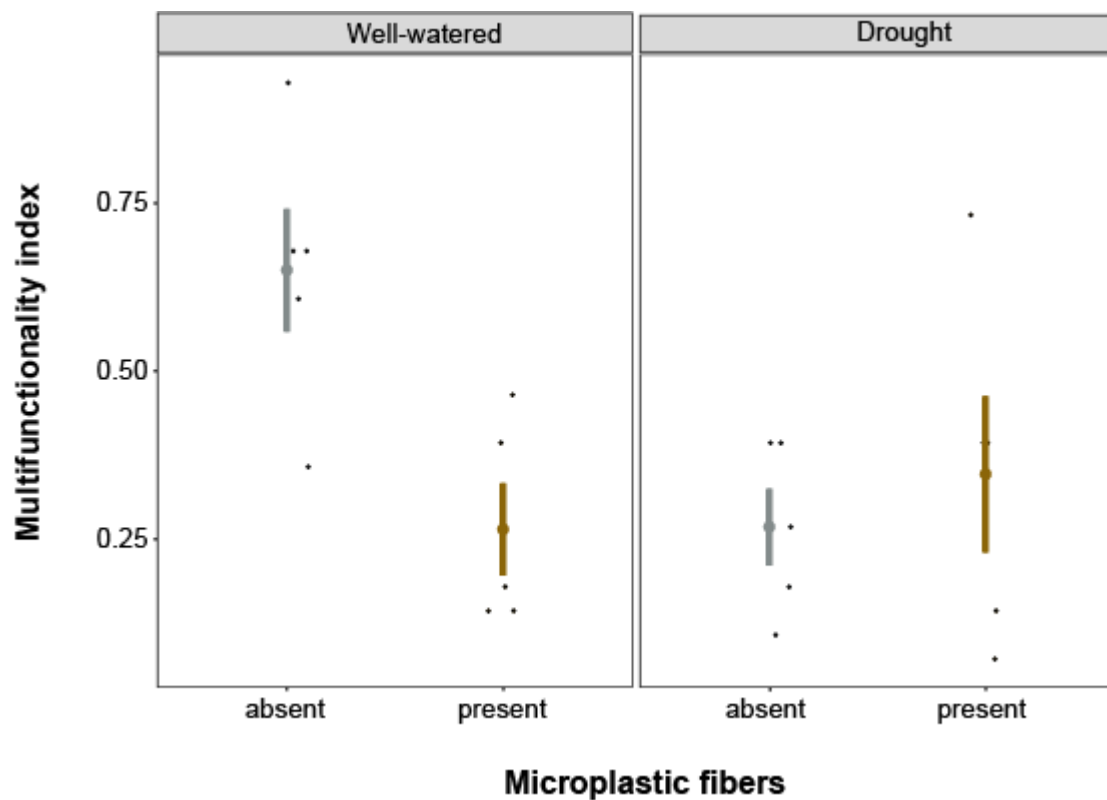

**FIGURE 3.** Relative importance of each predictor to multifunctionality. The proportionate contribution of each function considered both its direct effect (i.e., its correlation with multifunctionality) and its effect when combined with the other variables in the regression equation. The metrics “pmvd” was used for the calculation and the down-weighting via the cluster was taken into account.

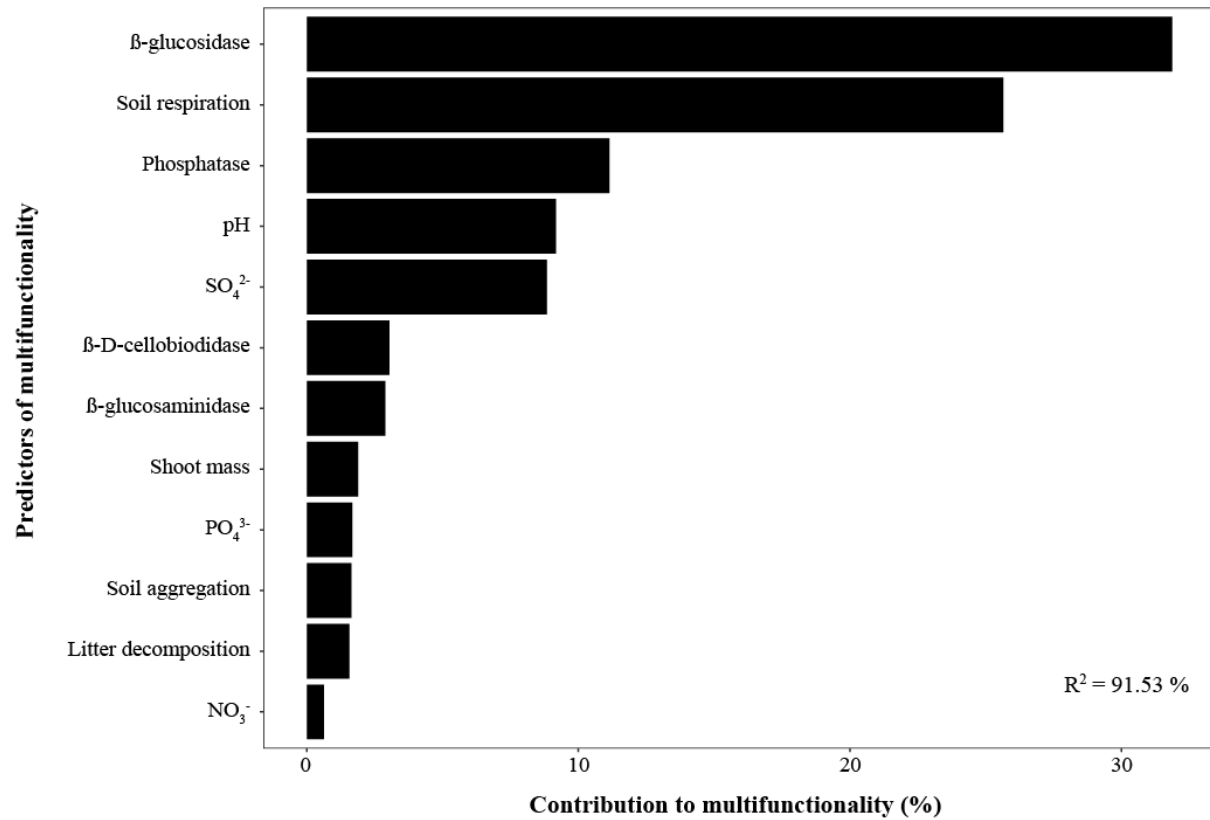

Source: https://www.biorxiv.org/content/10.1101/2020.07.26.221929v1.full.pdf
